# Supplementary material for: Total synthesis of (+)-belactosin A
Source: Royal Society of Chemistry journal article supplement (doi:10.1039/b316142k), 2004-01-01
Supplement: b316142k.pdf [file b316142k.pdf]

## Supplementary information

### Total synthesis of (+)-Belactosin A

Alan Armstrong\* and James N. Scutt

All compounds **4-7** were prepared as previously described in reference 5b, from their enantiomeric precursors (i.e. **5** synthesised from (*R*)-glycidol benzyl ether etc).

#### (2*S*, 1'*R*, 2'*S*)- (*N*-(bis-boc)-*N*-(diphenylmethylene)-3-(2-aminocyclopropyl)) alanine *tert*-butyl ester

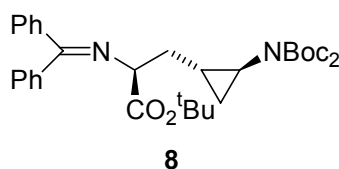

Prepared using *O*(9)-allyl-*N*-(9-anthracenylmethyl)-cinchonidinium bromide catalyst, as described in ref 3b. Aminocyclopropyl alanine **8** (67% yield) obtained as colourless needles (m.p. 127-128 °C) after recrystallisation from ether/hexane.

$[\alpha]_D^{27}$  -24 (*c* 1.32, CHCl<sub>3</sub>);  $\nu_{\max}/\text{cm}^{-1}$ (film) 3059, 2978, 1787, 1735, 1368, 1285, 1258, 1160, 1116, 801, 783, 698;  $\delta_{\text{H}}$  (500 MHz, d<sup>8</sup>-tol) 7.82-7.80 (2H, m, *ArH*), 7.16-6.98 (8H, m, *ArH*), 4.28 (1H, app t, *J*<sub>6,3</sub>, Ph<sub>2</sub>C=NCH), 2.73-2.69 (1H, m, Ph<sub>2</sub>C=NCHCH<sub>2</sub>), 2.41-2.39 (1H, m, CHNBoc<sub>2</sub>), 1.47-1.28 (29H, m, Ph<sub>2</sub>C=NCHCH<sub>2</sub>, Boc<sub>2</sub>, CO<sub>2</sub><sup>t</sup>Bu, CH(CH<sub>2</sub>)CHNBoc<sub>2</sub>), 0.85-0.81 (1H, m, (CH<sub>2</sub>)CHNBoc<sub>2</sub>), 0.74 (1H, app q, *J*<sub>6,5</sub>, (CH<sub>2</sub>)CHNBoc<sub>2</sub>);  $\delta_{\text{C}}$  (125 MHz, CDCl<sub>3</sub>) 171.0 (C), 169.7 (C), 153.0 (C), 139.6 (C), 136.7 (C), 132.4 (CH), 130.1 (CH), 130.0 (CH), 128.8 (CH), 128.5 (CH), 128.3 (CH), 128.0 (CH), 127.8 (CH), 82.1 (C), 80.9 (C), 65.0 (CH), 36.2 (CH<sub>2</sub>), 33.8 (CH), 28.1 (CH<sub>3</sub>), 28.0 (CH<sub>3</sub>), 20.4 (CH), 16.7 (CH<sub>2</sub>); *m/z* (CI, NH<sub>3</sub>) 565 [M+H]<sup>+</sup>, found : [M+H]<sup>+</sup>, 565.3304. C<sub>33</sub>H<sub>45</sub>N<sub>2</sub>O<sub>6</sub> requires [M+H]<sup>+</sup>, 565.3278.

**(S)-2-Amino-3-((1S,2S)-2-di-(tert-butoxycarbonyl)amino-cyclopropyl)-propionic acid tert-butyl ester**

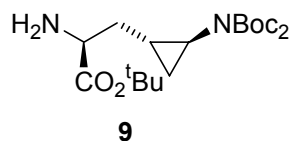

To a solution of **8** (0.29 g, 0.52 mmol), in THF (5.5 ml), was added aqueous citric acid (2.70 ml, 15 % solution) dropwise at room temperature. The mixture was then stirred rapidly for 1.5 hours, followed by dilution with ethyl acetate (100 ml), washing with saturated sodium hydrogen carbonate (100 ml), then further extraction with ethyl acetate (100 ml). Organic fractions were combined and dried over magnesium sulfate, followed by removal of solvents *in vacuo*. The crude mixture was then purified by column chromatography (ethyl acetate eluent), to afford the desired amine **9** (0.173 g, 84 %) as a clear oil;  $[\alpha]_D^{23}$  26.8 (*c* 1.34, CHCl<sub>3</sub>);  $\nu_{\max}/\text{cm}^{-1}$ (film) 3403, 2979, 2933, 1785, 1733, 1367, 1282, 1254, 1159, 1118, 852, 752;  $\delta_{\text{H}}$  (250 MHz, CDCl<sub>3</sub>) 3.54 (1H, dd, *J* 7.3, 5.2, H<sub>2</sub>NCH(CO<sub>2</sub><sup>t</sup>Bu)), 2.41-2.35 (1H, m, CHNBoc<sub>2</sub>), 1.92-1.80 (2H, m, NH<sub>2</sub>, (CO<sub>2</sub><sup>t</sup>Bu)CHCH<sub>2</sub>), 1.47-1.28 (29H, m, Boc<sub>2</sub>, CO<sub>2</sub><sup>t</sup>Bu, (CO<sub>2</sub><sup>t</sup>Bu)CHCH<sub>2</sub>), 1.13-1.00 (1H, m, CH(CH<sub>2</sub>)CHNBoc<sub>2</sub>), 0.85-0.81 (2H, m, (CH<sub>2</sub>)CHNBoc<sub>2</sub>);  $\delta_{\text{C}}$  (100 MHz, CDCl<sub>3</sub>) 174.5 (C), 153.2 (C), 82.3 (C), 80.9 (C), 54.6 (CH), 37.6 (CH<sub>2</sub>), 33.9 (CH), 28.0 (CH<sub>3</sub>), 19.4 (CH), 16.7 (CH<sub>2</sub>); *m/z* (CI, NH<sub>3</sub>) 401 [M+H]<sup>+</sup>, found : [M+H]<sup>+</sup>, 401.2654. C<sub>20</sub>H<sub>37</sub>N<sub>2</sub>O<sub>6</sub> requires [M+H]<sup>+</sup>, 401.2652.

***N*-CBz-L-alanine-(S)-2-Amino-3-((1S,2S)-2-di-(tert-butoxycarbonyl)amino-cyclopropyl)-propionic acid tert-butyl ester**

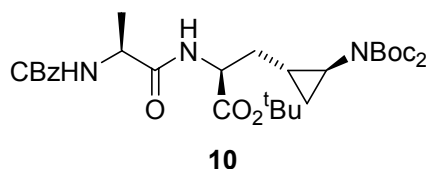

To a mixture of DCC (33 mg, 0.16 mmol) and HOBt (43 mg, 0.32 mmol) in DMF (1 ml), was added a solution of amine **9** (32 mg, 0.08 mmol) and *N*-CBz-Ala (36 mg,

0.16 mmol) in DMF (1 ml), followed by further washing with DMF (0.5 ml). The mixture was then stirred at room temperature for 1 hour. DMF was removed at high vacuum (warm water bath), followed by addition of ether (3 ml) and filtration of the urea by-product. The filtrate was then concentrated and purified by column chromatography (2 ether : 1 petrol eluent) to afford the desired amino acid **10** (50 mg, 100 %) as a white foam;  $[\alpha]_D^{20}$  6.0 (*c* 2.0, CHCl<sub>3</sub>);  $\nu_{\max}/\text{cm}^{-1}$ (film) 3314, 2980, 2933, 1726, 1674, 1368, 1274, 1257, 1160, 1121, 738;  $\delta_{\text{H}}$  (250 MHz, CDCl<sub>3</sub>) 8.75 (1H, d, *J* 9.5, NHCH(CO<sub>2</sub><sup>t</sup>Bu)), 7.36-7.28 (5H, m, Ar), 5.73 (1H, d, *J* 7.3, CBzNH), 5.10 (2H, s, PhCH<sub>2</sub>), 4.77-4.70 (1H, m, NHCH(CO<sub>2</sub><sup>t</sup>Bu)), 4.35 (1H, app quintet, *J* 7.3, CBzNHCH(Me)), 2.48-2.40 (2H, m, CHNBoc<sub>2</sub>, NHCH(CO<sub>2</sub><sup>t</sup>Bu)CH<sub>2</sub>), 1.51 (18H, s, Boc<sub>2</sub>), 1.44 (9H, s, CO<sub>2</sub><sup>t</sup>Bu), 1.18-1.05 (1H, m, NHCH(CO<sub>2</sub><sup>t</sup>Bu)CH<sub>2</sub>), 0.98-0.84 (1H, m, CH(CH<sub>2</sub>)CHNBoc<sub>2</sub>), 0.80-0.72 (1H, m, (CH<sub>2</sub>)CHNBoc<sub>2</sub>), 0.66 (1H, app q, (CH<sub>2</sub>)CHNBoc<sub>2</sub>);  $\delta_{\text{C}}$  (100 MHz, CDCl<sub>3</sub>) 171.9 (C), 170.3 (C), 155.6 (C), 153.8 (C), 136.5 (C), 128.5 (CH), 128.0 (CH), 128.0 (CH), 83.2 (C), 81.7 (C), 66.6 (CH<sub>2</sub>), 51.5 (CH), 50.2 (CH), 35.1 (CH), 34.4 (CH<sub>2</sub>), 28.0 (CH<sub>3</sub>), 19.8 (CH), 16.7 (CH<sub>2</sub>), 13.7 (CH<sub>3</sub>); *m/z* (CI, NH<sub>3</sub>) 606 [M+H]<sup>+</sup>, found : [M+H]<sup>+</sup>, 606.3381. C<sub>31</sub>H<sub>48</sub>N<sub>3</sub>O<sub>9</sub> requires [M+H]<sup>+</sup>, 606.3391.

***N*-CBz-L-alanine-(S)-2-Amino-3-((1R,2S)-2-amino-cyclopropyl)-propionic acid .**

**TFA**

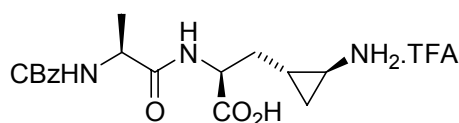

**11**

To a stirred solution of amino acid **10** (200 mg, 0.33 mmol) in dichloromethane (3.70 ml) at 0 °C was added TFA (3.70 ml) dropwise, and the mixture was placed in a fridge (approx 15 °C) for 20 h. Solvents were removed *in vacuo*, and the mixture was diluted with distilled water (25 ml), and washed with ether (25 ml). Aqueous fractions were concentrated *in vacuo*, and the residue was then freeze dried to afford the desired amine salt **11** (0.137 g, 90 %). This material was used directly in the next step without further purification.

**(2R,3S)-3-((S)-*sec*-Butyl)-4-oxo-oxetane-2-carboxylic acid *tert*-butyl ester**

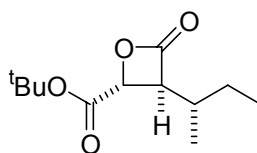

**19**

To a cooled solution of acid **18** (0.69 g, 2.71 mmol), in THF (20 ml) at  $-78\text{ }^{\circ}\text{C}$ , was added LiHMDS (6.54 ml, 6.54 mmol, 1.00 M solution in hexanes), dropwise. After stirring at  $-78\text{ }^{\circ}\text{C}$  for 45 min carbon tetrachloride (0.316 ml, 3.268 mmol) was added dropwise. The mixture was then stirred at  $-78\text{ }^{\circ}\text{C}$  for 30 min, then allowed to warm to room temperature and stir for a further 10 min. Most of the solvent was removed *in vacuo* followed by addition of ether (20 ml) then 5 % aqueous sodium bicarbonate (20 ml) with subsequent rapid stirring for 20 h. The mixture was diluted with ether (150 ml), washed with saturated sodium bicarbonate (2 x 50 ml), then dried over magnesium sulfate and concentrated *in vacuo*. The crude material was purified by flash column chromatography (3 petrol : 1 ether eluent), affording the desired  $\beta$ -lactone **19** (0.38 g, 55 %) as a white solid, which was recrystallised (ether/petrol) to afford **19** as white needles (m.p.  $44\text{-}45\text{ }^{\circ}\text{C}$ );  $[\alpha]_{\text{D}}^{20} -8.2$  ( $c$  0.73,  $\text{CHCl}_3$ );  $\nu_{\text{max}}/\text{cm}^{-1}$  (film) 2966, 2934, 2879, 1839, 1752, 1703, 1460, 1370, 1238, 1157, 1105, 1010, 930;  $\delta_{\text{H}}$  (250 MHz,  $\text{CDCl}_3$ ) 4.53 (1H, d,  $J$  4.3,  $^t\text{BuO}_2\text{CCH}$ ), 3.58 (1H, dd,  $J$  7.8, 4.3,  $^t\text{BuO}_2\text{CCHCH}$ ), 2.05-1.88 (1H, m,  $\text{CH}(\text{CH}_3)\text{Et}$ ), 1.68-1.51 (1H, m,  $\text{CH}_2\text{CH}_3$ ), 1.48 (9H, s,  $\text{CO}_2^t\text{Bu}$ ), 1.39-1.21 (1H, m,  $\text{CH}_2\text{CH}_3$ ), 1.01 (1H, d,  $J$  6.7,  $\text{CH}(\text{CH}_3)\text{Et}$ ), 0.91 (1H, app t,  $J$  7.6,  $\text{CH}_2\text{CH}_3$ );  $\delta_{\text{C}}$  (125 MHz,  $\text{CDCl}_3$ ) 11.0 ( $\text{CH}_3$ ), 16.3 ( $\text{CH}_3$ ), 26.8 ( $\text{CH}_2$ ), 27.9 ( $\text{CH}_3$ ), 33.5 ( $\text{CH}_2$ ), 62.4 ( $\text{CH}$ ), 69.5 ( $\text{CH}$ ), 83.5 (C), 167.5 (C), 169.1 (C);  $m/z$  (CI,  $\text{NH}_3$ ) 246  $[\text{M}+\text{NH}_4]^+$ , found :  $[\text{M}+\text{NH}_4]^+$ , 246.1696.  $\text{C}_{12}\text{H}_{24}\text{NO}_4$  requires  $[\text{M}+\text{NH}_4]^+$ , 246.1705.

**(2R,3S)-3-((S)-*sec*-Butyl)-4-oxo-oxetane-2-carboxylic acid**

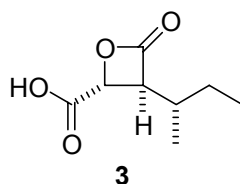

To a cooled solution of  $\beta$ -lactone **19** (0.14 g, 0.59 mmol) in dichloromethane (4 ml) at 0 °C, was added TFA dropwise (4 ml). The mixture was then stirred at this temperature for 15 hours, after which solvents were removed *in vacuo*, and the residue azeotropeed from toluene (4 ml). After further concentration the mixture was then purified by column chromatography (9 CHCl<sub>3</sub> : 1 MeOH : 0.1 AcOH eluent), to afford acid **3** (0.92 g, 90 %) as a clear oil. This material was used directly in the next step.

***N*-CBz belactosin A**

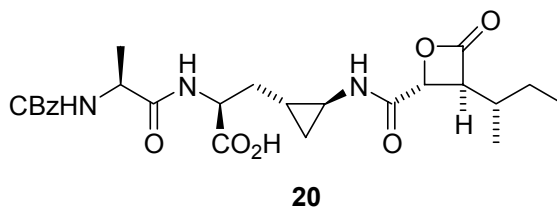

To a cooled solution of  $\beta$ -lactone **3** (36 mg, 0.21 mmol) in CH<sub>2</sub>Cl<sub>2</sub> (2.30 ml) at 0 °C was added distilled water (2.30 ml), then HOBt (0.114 g, 0.84 mmol) and EDCI (81 mg, 0.42 mmol). The biphasic mixture was then stirred rapidly at 0 °C for 10 min, followed by transfer of the organic phase dropwise to a cooled solution (0 °C) of amine salt **11** (65 mg, 0.14 mmol) and Hunig's base (73  $\mu$ l, 0.42 mmol) in DMF (1 ml) (previously stirred for 10 min). This mixture was then further stirred at this temperature for 1 hour, followed by removal of all solvents at high vacuum. The crude material was directly purified by column chromatography (9.5 CHCl<sub>3</sub> : 0.5 MeOH : 0.1 AcOH eluent), then recrystallised from ethyl acetate/pentane to afford *N*-CBz belactosin A **20** (35 mg, 50 %) as a white foam;  $[\alpha]_D^{23}$  -8.7 (*c* 0.69, CHCl<sub>3</sub>);

$\nu_{\max}/\text{cm}^{-1}$ (film) 3416, 2964, 1837, 1717, 1662, 1525, 1454, 1260, 1097, 909, 733;  $\delta_{\text{H}}$  (400 MHz,  $d_6$ -acetone) 9.03 (1H, d,  $J$  9.1,  $\text{NHCH}(\text{CO}_2\text{H})$ ), 8.02 (1H, s,  $(\text{CH}_2)\text{CHNHC}(\text{O})$ ), 7.38-7.27 (5H, m, Ar), 6.41 (1H, d,  $J$  7.7,  $\text{CBzNH}$ ), 5.06 (2H, s,  $\text{PhCH}_2$ ), 4.81 (1H, d,  $J$  4.4,  $\text{NHC}(\text{O})\text{CH}$ ), 4.78-4.74 (1H, m,  $\text{NHCH}(\text{CO}_2\text{H})$ ), 4.43-4.36 (1H, m,  $\text{CBzNHCH}(\text{Me})$ ), 3.70 (1H, dd,  $J$  8.0, 4.4,  $\text{NHC}(\text{O})\text{CHCH}$ ), 2.64-2.62 (1H, m,  $\text{CHNHC}(\text{O})$ ), 2.36 (1H, app dt,  $J$  14.6, 2.9,  $\text{NHCH}(\text{CO}_2\text{H})\text{CH}_2$ ), 1.98-1.92 (1H, m,  $\text{CH}(\text{CH}_3)\text{Et}$ ), 1.69-1.59 (1H, m,  $\text{CH}_2\text{CH}_3$ ), 1.39 (3H, d,  $J$  7.0,  $\text{CBzNHCH}(\text{CH}_3)$ ), 1.32-1.18 (2H, m,  $\text{NHCH}(\text{CO}_2\text{H})\text{CH}_2$ ,  $\text{CH}_2\text{CH}_3$ ), 1.03 (1H, d,  $J$  6.6,  $\text{CH}(\text{CH}_3)\text{Et}$ ), 0.96-0.81 (5H, m,  $\text{CH}_2\text{CH}_3$ ,  $\text{CH}(\text{CH}_2)\text{CHNH}$ ,  $(\text{CH}_2)\text{CHNH}$ ), 0.61-0.56 (1H, m,  $(\text{CH}_2)\text{CHNH}$ );  $\delta_{\text{C}}$  (100 MHz,  $\text{CDCl}_3$ ) 174.3 (C), 173.8 (C), 171.1 (C), 168.7 (C), 155.9 (C), 136.2 (C), 128.5 (CH), 128.1 (CH), 127.9 (CH), 70.2 (CH), 66.7 (CH<sub>2</sub>), 62.9 (CH), 51.5 (CH), 50.4 (CH), 33.8 (CH), 33.4 (CH<sub>2</sub>), 29.5 (CH), 26.7 (CH<sub>2</sub>), 19.1 (CH<sub>3</sub>), 16.8 (CH), 16.3 (CH<sub>3</sub>), 11.0 (CH<sub>3</sub>), 10.2 (CH<sub>2</sub>);  $m/z$  (FAB, +ve) 504  $[\text{M}+\text{H}]^+$ , found :  $[\text{M}+\text{H}]^+$ , 504.2345.  $\text{C}_{25}\text{H}_{34}\text{N}_3\text{O}_8$  requires  $[\text{M}+\text{H}]^+$ , 504.2346.

### Belactosin A <sup>2a</sup>

<sup>2a</sup> T. Mizukami, A. Asai, Y. Yamashita, R. Katahira, A. Hasegawa, K. Ochiai and S. Akinaga, Eur. Patent 768317, 1997.

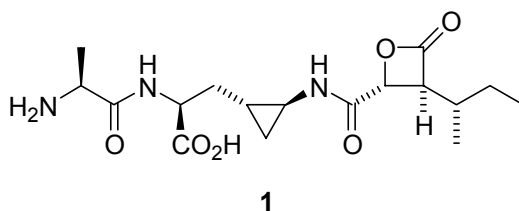

To a mixture of *N*-CBz belactosin A **20** (24 mg, 0.048 mmol) and Pd/C (24 mg), was added THF (1ml) and the mixture was thoroughly purged with H<sub>2</sub> until the solvent volume was approximately 0.30 ml. To this suspension was added formic acid (0.20 ml), and the mixture was placed under a balloon pressure of H<sub>2</sub>, and stirred at room temperature for 2.5 hours. The suspension was then filtered, washed with CH<sub>2</sub>Cl<sub>2</sub> (2 x 2 ml), and concentrated *in vacuo*. Distilled water was added (2 x 1 ml), and the dissolved filtrate was again filtered then concentrated at high vacuum. The residue

was finally azeotroped with toluene/MeOH (2:1, 3 ml), to afford pure belactosin A **1** (17 mg, 96 %) as a white solid (m.p. 186-187 °C);  $[\alpha]_D^{21} +4.8$  (*c* 0.84, H<sub>2</sub>O);  $\nu_{\max}/\text{cm}^{-1}$ (film) 3252, 3074, 2964, 1832, 1674, 1598, 1397, 1205, 1139, 911, 801, 723;  $\delta_{\text{H}}$  (500 MHz, D<sub>2</sub>O) 4.92 (1H, d, *J* 4.5, NHC(O)CH), 4.40 (1H, app t, *J* 5.7, NHCH(CO<sub>2</sub>H)), 4.20 (1H, q, *J* 7.1, H<sub>2</sub>NCH(Me)), 3.90 (1H, dd, *J* 7.4, 4.5, NHC(O)CHCH), 2.58 (1H, app dt, *J* 7.4, 3.7, CHNHC(O)), 2.11-2.05 (1H, m, CH(CH<sub>3</sub>)Et), 1.96 (1H, app dt, *J* 14.4, 6.0, NHCH(CO<sub>2</sub>H)CH<sub>2</sub>), 1.70 (1H, ddd, *J* 14.4, 8.4, 5.6, NHCH(CO<sub>2</sub>H)CH<sub>2</sub>), 1.63 (3H, d, *J* 7.1, H<sub>2</sub>NCH(CH<sub>3</sub>)), 1.62-1.55 (1H, m, CH<sub>2</sub>CH<sub>3</sub>), 1.41-1.32 (1H, m, CH<sub>2</sub>CH<sub>3</sub>), 1.06 (1H, d, *J* 6.7, CH(CH<sub>3</sub>)Et), 1.02-0.98 (1H, m, CH(CH<sub>2</sub>)CHNH), 0.95 (1H, app t, *J* 7.4, CH<sub>2</sub>CH<sub>3</sub>), 0.93-0.87 (1H, m, (CH<sub>2</sub>)CHNH), 0.77 (1H, app dt, *J* 7.4, 6.0, (CH<sub>2</sub>)CHNH);  $\delta_{\text{C}}$  (62 MHz, D<sub>2</sub>O) 178.5 (C), 173.5 (C), 172.7 (C), 170.8 (C), 71.7 (CH), 62.7 (CH), 55.7 (CH), 50.0 (CH), 34.5 (CH<sub>2</sub>), 33.6 (CH), 29.2 (CH), 27.0 (CH<sub>2</sub>), 17.3 (CH<sub>3</sub>), 16.7 (CH), 16.2 (CH<sub>3</sub>), 12.0 (CH<sub>2</sub>), 11.1 (CH<sub>3</sub>); *m/z* (FAB, +ve) 370 [M+H]<sup>+</sup>, found : [M+H]<sup>+</sup>, 370.1981. C<sub>25</sub>H<sub>34</sub>N<sub>3</sub>O<sub>8</sub> requires [M+H]<sup>+</sup>, 370.1978.

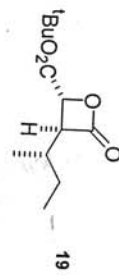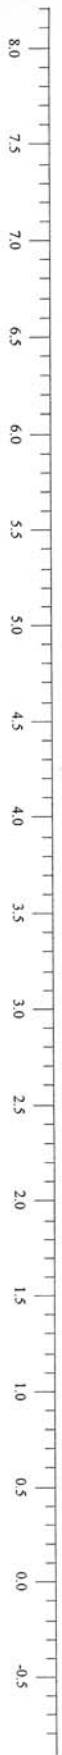



J SCUTT JNSH. 430 IN CDCL3 : 13C(1H) SPECTRUM USING AM500

PPM

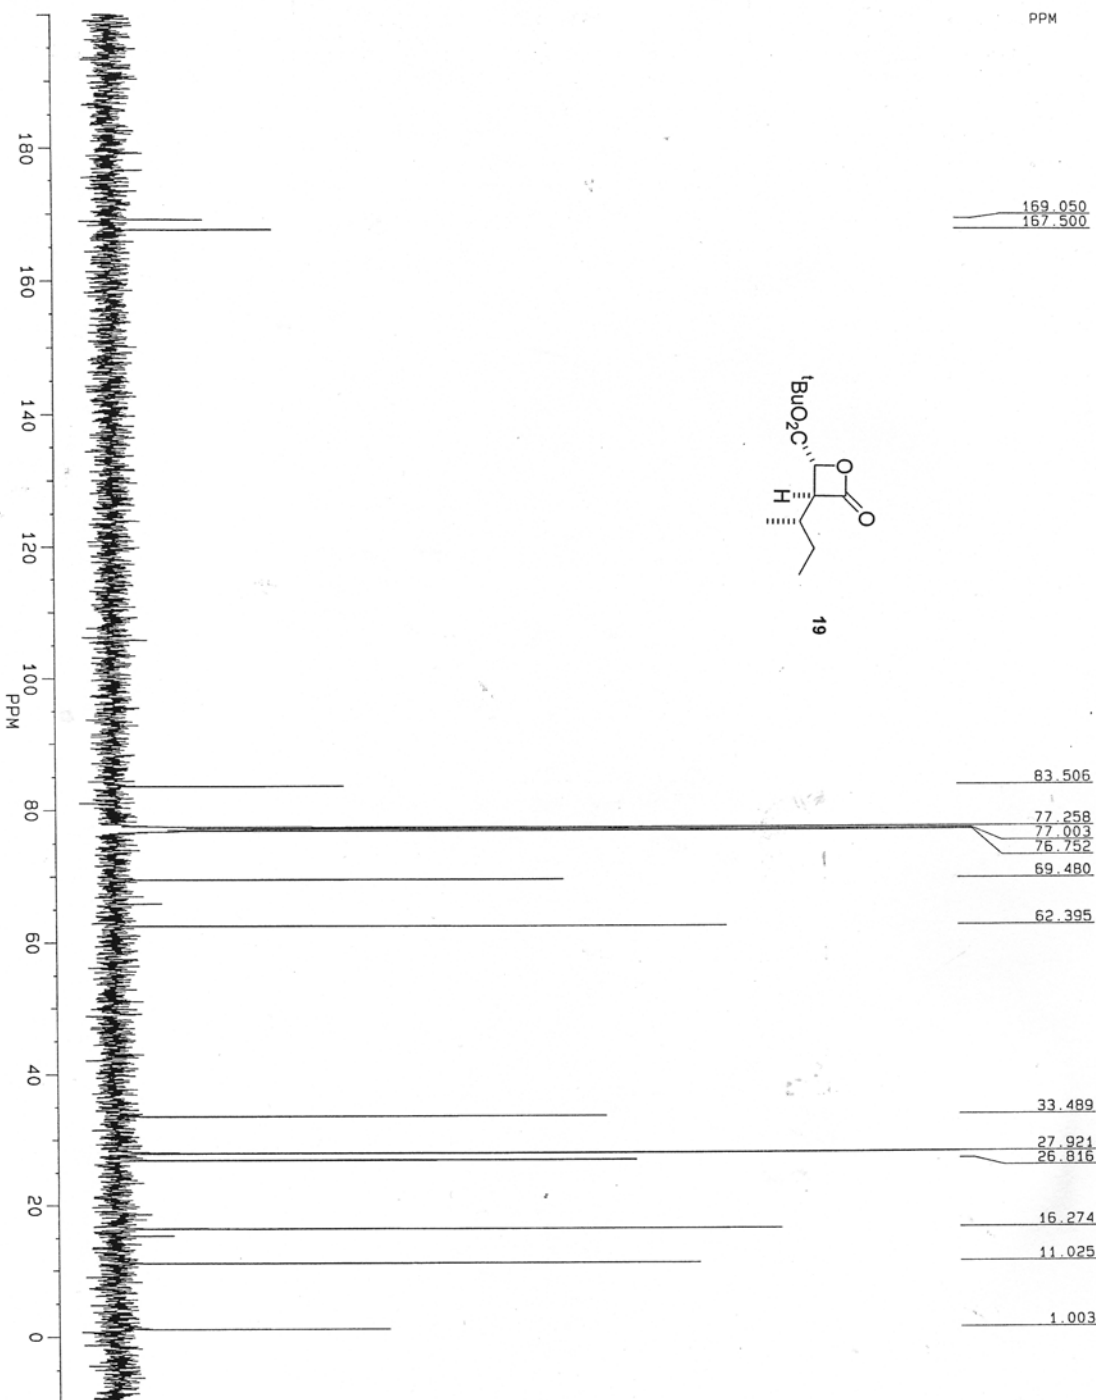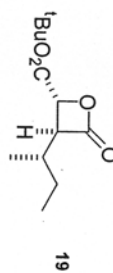

169.050  
167.500

83.506

77.258  
77.003  
76.752

69.480

62.395

33.489

27.921  
26.816

16.274

11.025

1.003

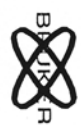

JS090903.002  
DATE 9-9-3

SF 125.759  
 SY 93.0  
 O1 36500.000  
 SI 32768  
 TD 32768  
 SW 31250.000  
 HZ/PT 1.907

PW 2.5  
 RD 1.000  
 AQ .524  
 RG 40  
 NS 809  
 TE 297

FW 39100  
 O2 8000.000  
 DP 14H CPD

LB 2.000  
 GB 0.0  
 CX 23.00  
 CY 0.0  
 F1 200.002P  
 F2 -9.996P  
 HZ/CM 1.148E3  
 PPM/CM 9.130  
 SR 23148.71

belactosin A

Natural product <sup>1</sup>H NMR supplied  
by Kyowa Hakko Co., Ltd

HH-09  
UCERMA

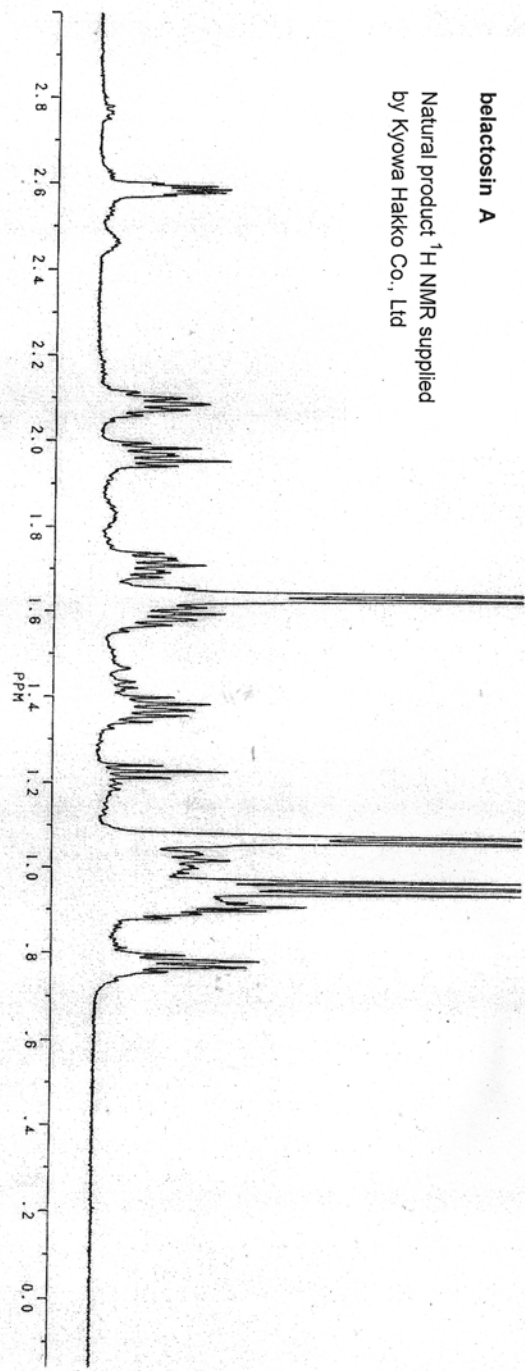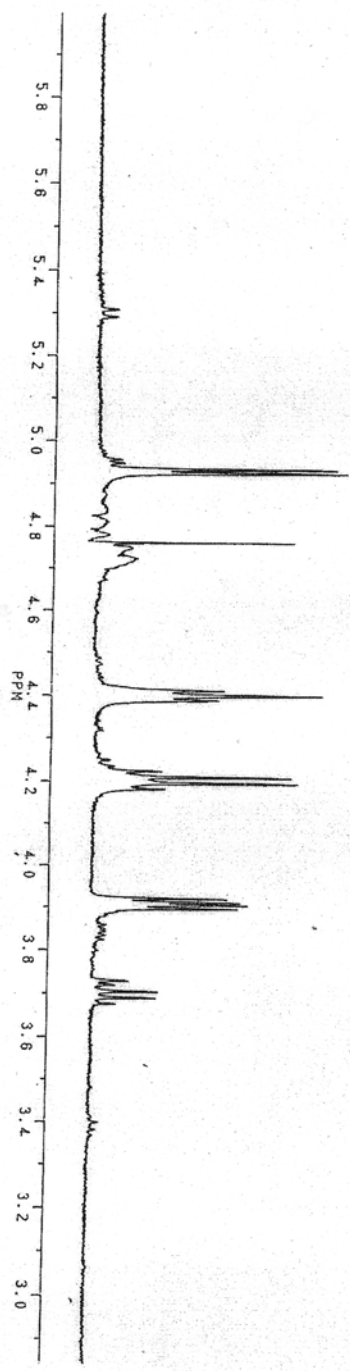

JNH4445  
 AU PROG  
 PRESAT. AUR  
 DATE 1-6-95  
 SF 500.137  
 SF0 500.130  
 SY 60.0  
 O1 9031.116  
 S1 65536  
 TD 65536  
 SM 10000.000  
 HZ/P1 .305  
 PM 3.5  
 RD 0.0  
 AO 3.277  
 RG 62  
 NS 128  
 TE 300  
 FM 12500  
 OF 6031.116  
 DF 18L F0  
 LB 0.0  
 CB 0.0  
 CX 31.80  
 CY 21.50  
 F1 6.000P  
 F2 2.840P  
 HZ/CH 50.006  
 PM/CH 100  
 SR 6850.47  
 Yds. Usak

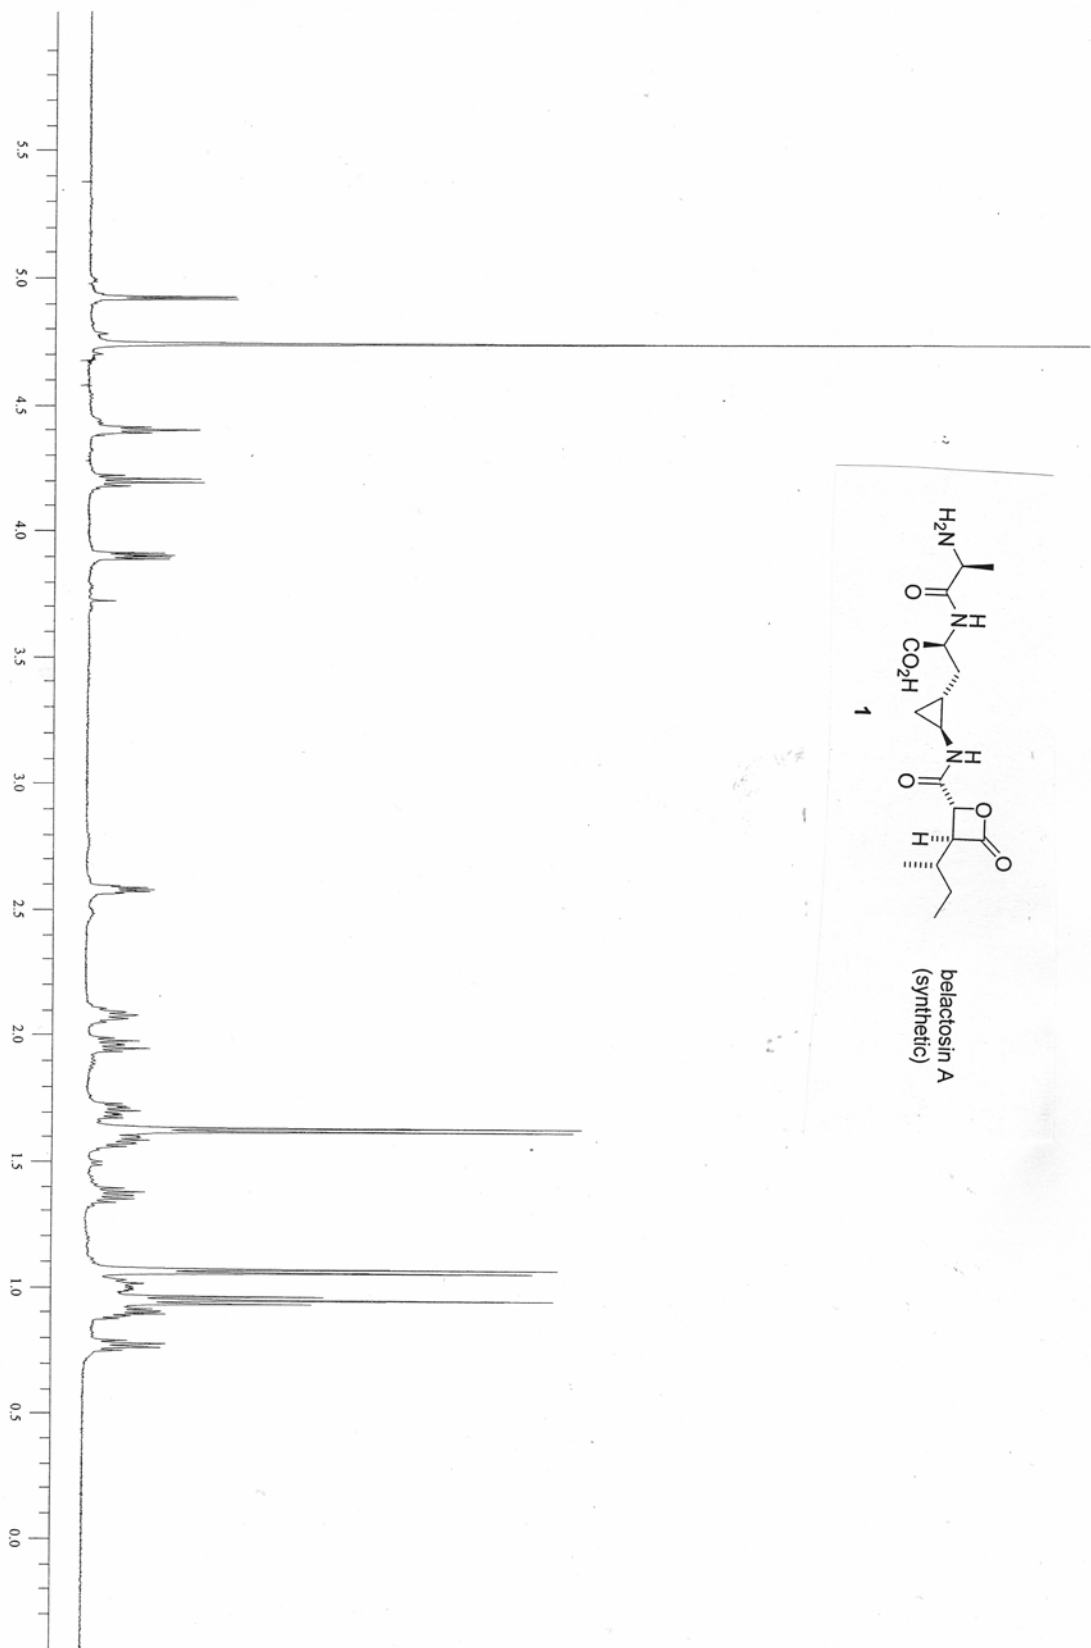

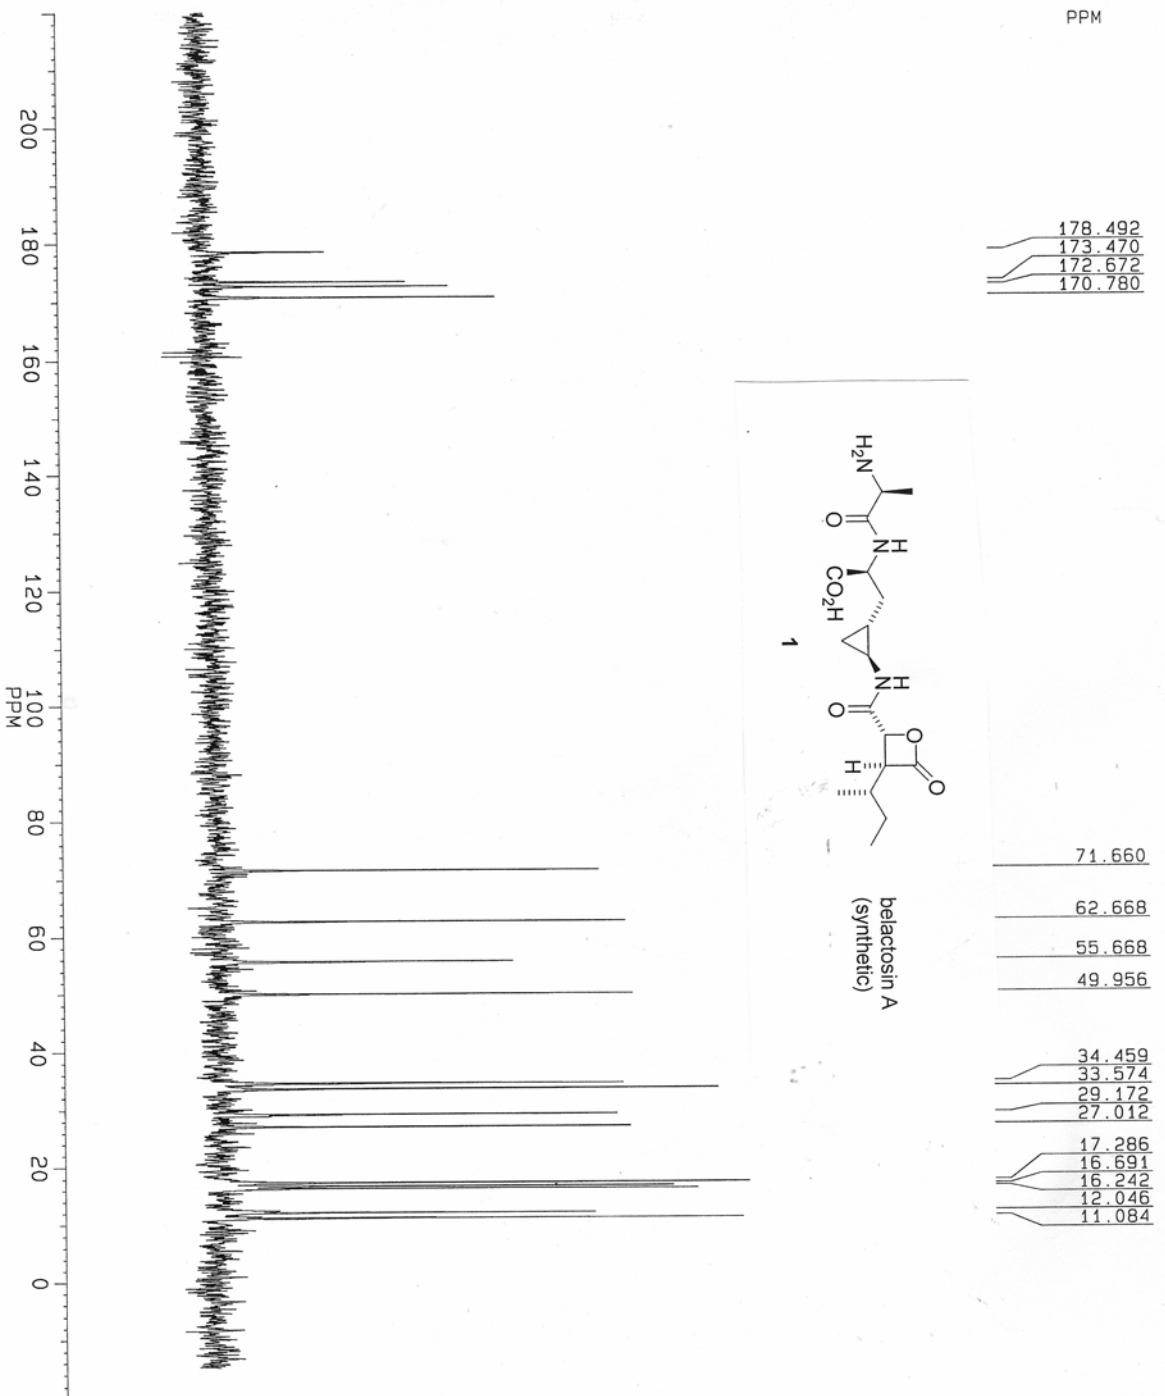

JNSC. 538

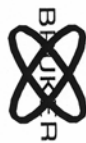

JNSC. 538  
DATE 25-11-3

|        |           |
|--------|-----------|
| SF     | 62.896    |
| SF0    | 62.894    |
| O1     | 12000.000 |
| SI     | 16384     |
| TD     | 16384     |
| SW     | 21739.130 |
| HZ/PT  | 2.654     |
| PW     | 2.0       |
| RD     | 1.000     |
| AQ     | .377      |
| RG     | 320       |
| NS     | 32410     |
| TE     | 297       |
| FW     | 27200     |
| O2     | 4700.000  |
| DP     | 18H D0    |
| LB     | 3.000     |
| GB     | 0.0       |
| GX     | 23.00     |
| CY     | 0.0       |
| F1     | 220.017f  |
| F2     | -19.971f  |
| HZ/CM  | 656.272   |
| PPM/CM | 10.434    |
| SR     | 2065.41   |

## X-ray data for compound 19

Table 1. Crystal data and structure refinement for AA0305.

|                                    |                                                                                                                   |
|------------------------------------|-------------------------------------------------------------------------------------------------------------------|
| Identification code                | AA0305                                                                                                            |
| Empirical formula                  | C12 H20 O4                                                                                                        |
| Formula weight                     | 228.28                                                                                                            |
| Temperature                        | 293(2) K                                                                                                          |
| Diffractometer, wavelength         | Bruker P4, 1.54178 Å                                                                                              |
| Crystal system, space group        | Orthorhombic, P2(1)2(1)2(1)                                                                                       |
| Unit cell dimensions               | a = 6.0476(7) Å $\alpha = 90^\circ$<br>b = 11.4445(7) Å $\beta = 90^\circ$<br>c = 19.263(3) Å $\gamma = 90^\circ$ |
| Volume, Z                          | 1333.2(3) Å <sup>3</sup> , 4                                                                                      |
| Density (calculated)               | 1.137 Mg/m <sup>3</sup>                                                                                           |
| Absorption coefficient             | 0.692 mm <sup>-1</sup>                                                                                            |
| F(000)                             | 496                                                                                                               |
| Crystal colour / morphology        | Colourless needles                                                                                                |
| Crystal size                       | 1.00 x 0.33 x 0.10 mm <sup>3</sup>                                                                                |
| $\theta$ range for data collection | 4.59 to 64.99°                                                                                                    |
| Index ranges                       | 0 ≤ h ≤ 7, 0 ≤ k ≤ 13, -22 ≤ l ≤ 0                                                                                |
| Reflns collected / unique          | 1342 / 1342 [R(int) = 0.0000]                                                                                     |
| Reflns observed [F > 4σ(F)]        | 1091                                                                                                              |
| Absorption correction              | None                                                                                                              |
| Refinement method                  | Full-matrix least-squares on F <sup>2</sup>                                                                       |
| Data / restraints / parameters     | 1342 / 0 / 146                                                                                                    |
| Goodness-of-fit on F <sup>2</sup>  | 1.059                                                                                                             |
| Final R indices [F > 4σ(F)]        | R1 = 0.0509, wR2 = 0.1389<br>R1+ = 0.0509, wR2+ = 0.1389<br>R1- = 0.0511, wR2- = 0.1395                           |
| R indices (all data)               | R1 = 0.0617, wR2 = 0.1479                                                                                         |
| Absolute structure parameter       | x+ = 0.0(6), x- = *****                                                                                           |
| Extinction coefficient             | 0.033(3)                                                                                                          |
| Largest diff. peak, hole           | 0.144, -0.124 eÅ <sup>-3</sup>                                                                                    |
| Mean and maximum shift/error       | 0.000 and 0.000                                                                                                   |

Table 2. Bond lengths [Å] and angles [°] for AA0305.

|                   |          |
|-------------------|----------|
| O(1)-C(2)         | 1.343(6) |
| O(1)-C(4)         | 1.461(4) |
| C(2)-O(2)         | 1.189(6) |
| C(2)-C(3)         | 1.513(5) |
| C(3)-C(5)         | 1.518(5) |
| C(3)-C(4)         | 1.538(5) |
| C(4)-C(9)         | 1.522(5) |
| C(5)-C(8)         | 1.527(5) |
| C(5)-C(6)         | 1.532(6) |
| C(6)-C(7)         | 1.515(6) |
| C(9)-O(9)         | 1.187(4) |
| C(9)-O(10)        | 1.328(4) |
| O(10)-C(11)       | 1.484(4) |
| C(11)-C(12)       | 1.498(6) |
| C(11)-C(14)       | 1.511(6) |
| C(11)-C(13)       | 1.518(5) |
|                   |          |
| C(2)-O(1)-C(4)    | 91.6(3)  |
| O(2)-C(2)-O(1)    | 126.8(4) |
| O(2)-C(2)-C(3)    | 137.5(5) |
| O(1)-C(2)-C(3)    | 95.8(3)  |
| C(2)-C(3)-C(5)    | 119.3(3) |
| C(2)-C(3)-C(4)    | 82.5(3)  |
| C(5)-C(3)-C(4)    | 120.0(3) |
| O(1)-C(4)-C(9)    | 111.3(3) |
| O(1)-C(4)-C(3)    | 90.0(3)  |
| C(9)-C(4)-C(3)    | 114.1(3) |
| C(3)-C(5)-C(8)    | 109.2(3) |
| C(3)-C(5)-C(6)    | 109.1(3) |
| C(8)-C(5)-C(6)    | 112.8(3) |
| C(7)-C(6)-C(5)    | 114.2(4) |
| O(9)-C(9)-O(10)   | 127.6(4) |
| O(9)-C(9)-C(4)    | 123.5(3) |
| O(10)-C(9)-C(4)   | 108.8(3) |
| C(9)-O(10)-C(11)  | 121.9(3) |
| O(10)-C(11)-C(12) | 109.7(3) |
| O(10)-C(11)-C(14) | 108.6(3) |
| C(12)-C(11)-C(14) | 113.0(4) |
| O(10)-C(11)-C(13) | 103.0(3) |
| C(12)-C(11)-C(13) | 110.7(4) |
| C(14)-C(11)-C(13) | 111.4(4) |

Symmetry transformations used to generate equivalent atoms:
